# Supplementary material for: Large-scale localization of touching somas from 3D images using density-peak clustering
Source: PubMed Central journal article supplement (PMC5024436; doi:10.1186/s12859-016-1252-x), 2016-09-15
Supplement: 12859_2016_1252_MOESM2_ESM.pdf [file 12859_2016_1252_MOESM2_ESM.pdf]

**Additional File 2: The localization result comparison of the proposed method and other methods on nine different datasets**

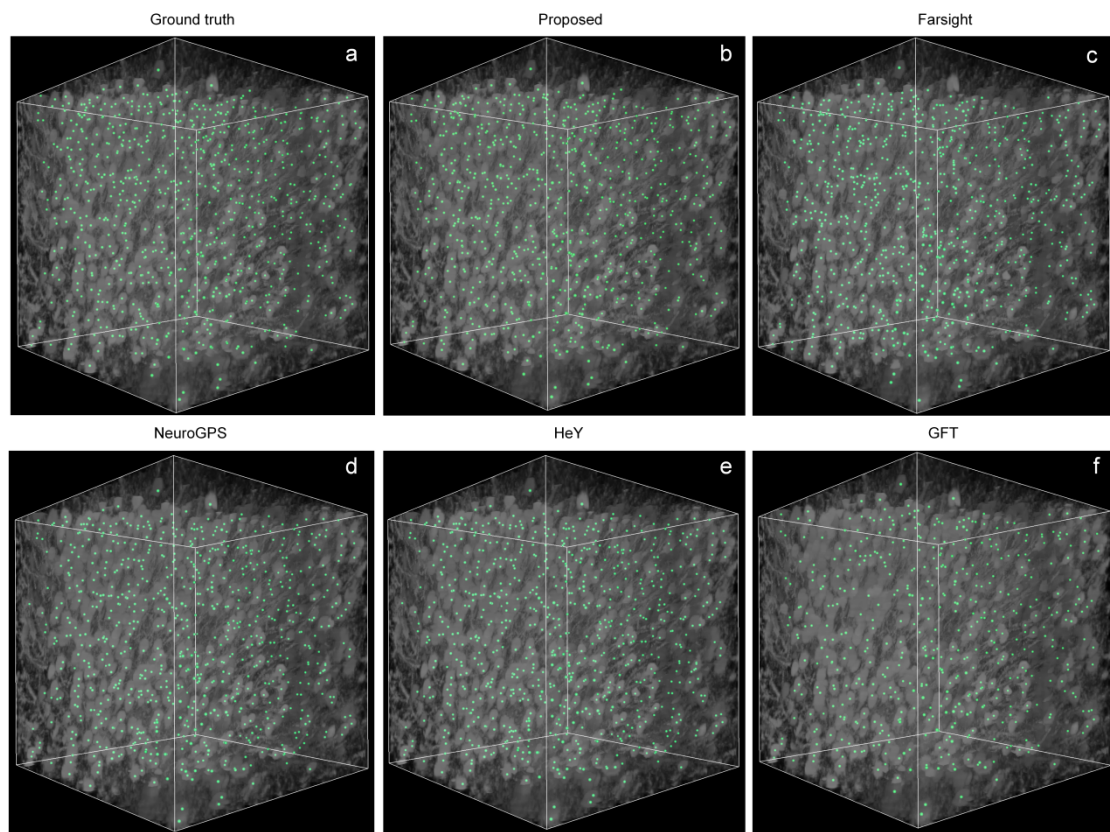

**Fig. S1.** Localization results of Data1.

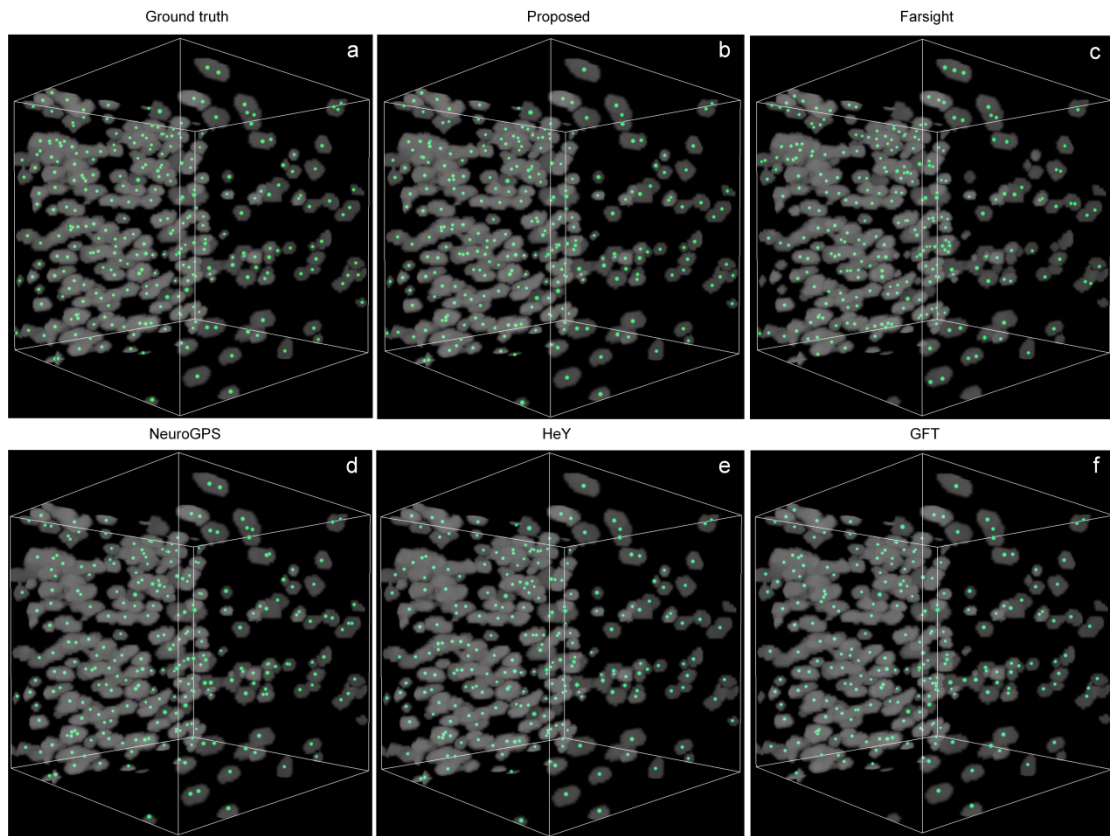

**Fig. S2.** Localization results of Data2. The preprocessed images are shown.

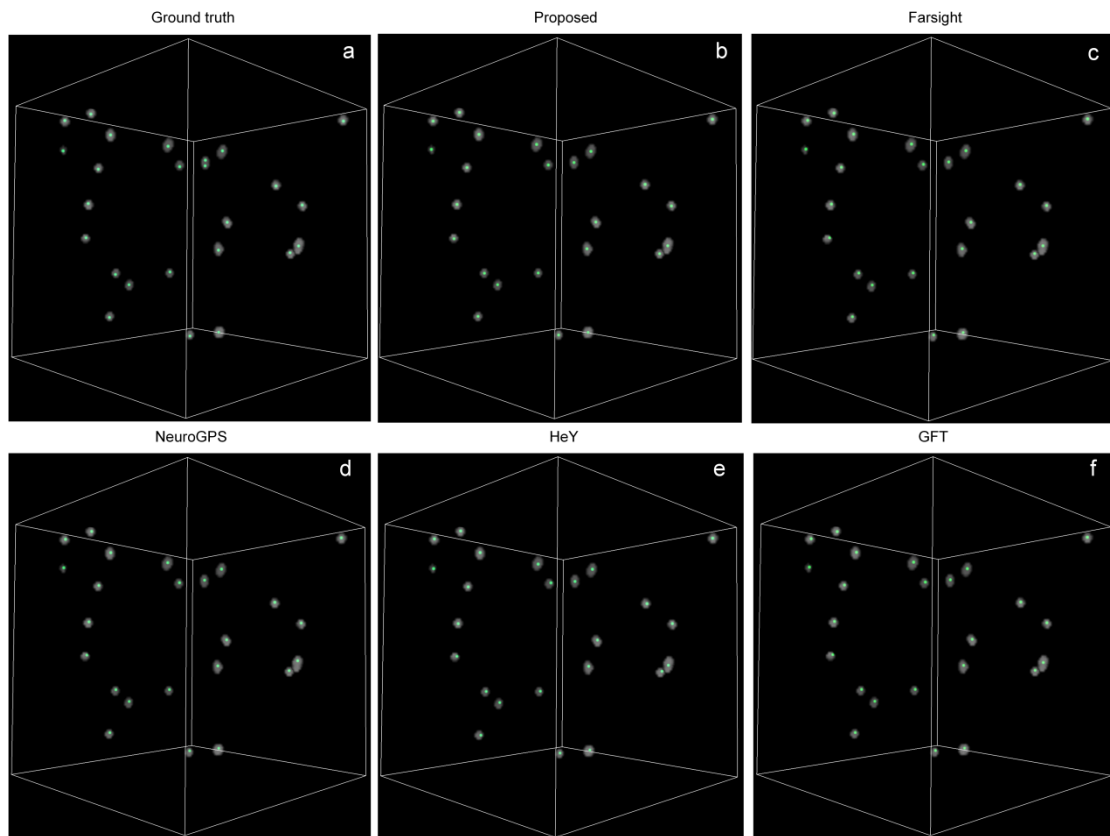

**Fig. S3.** Localization results of Data3. The preprocessed images are shown.

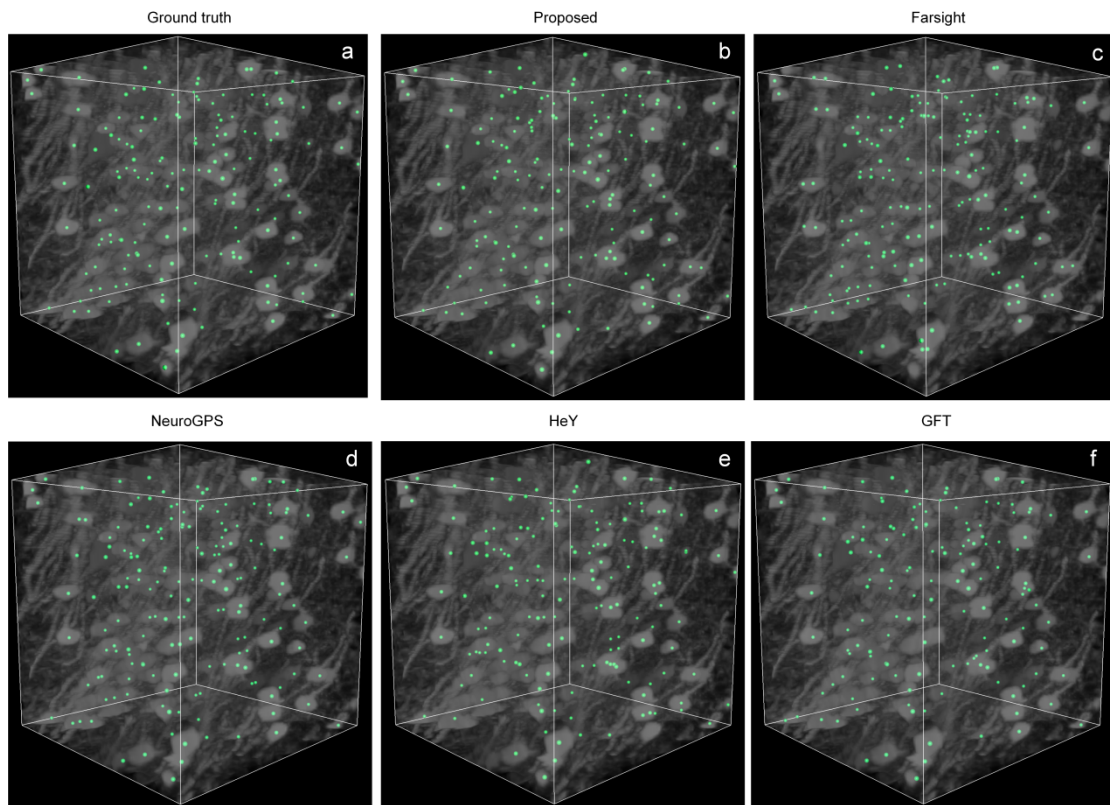

**Fig. S4.** Localization results of Data4.

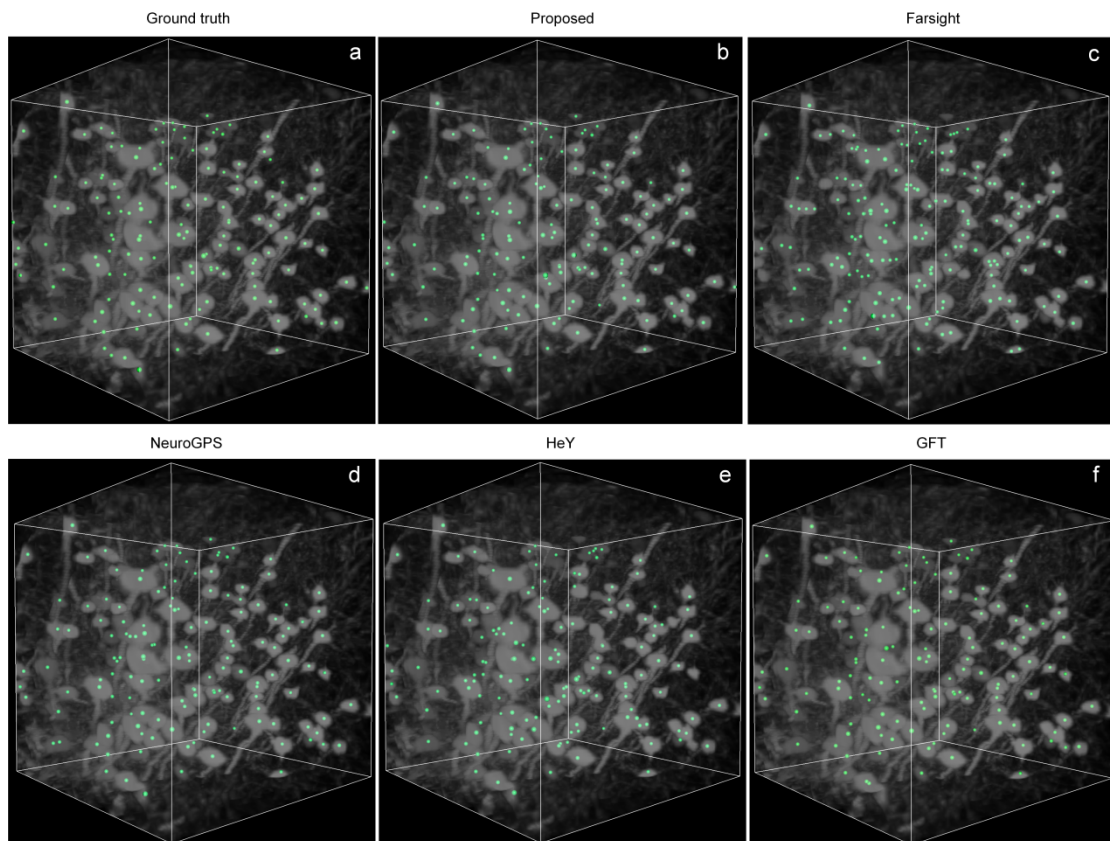



**Fig. S5.** Localization results of Data5.

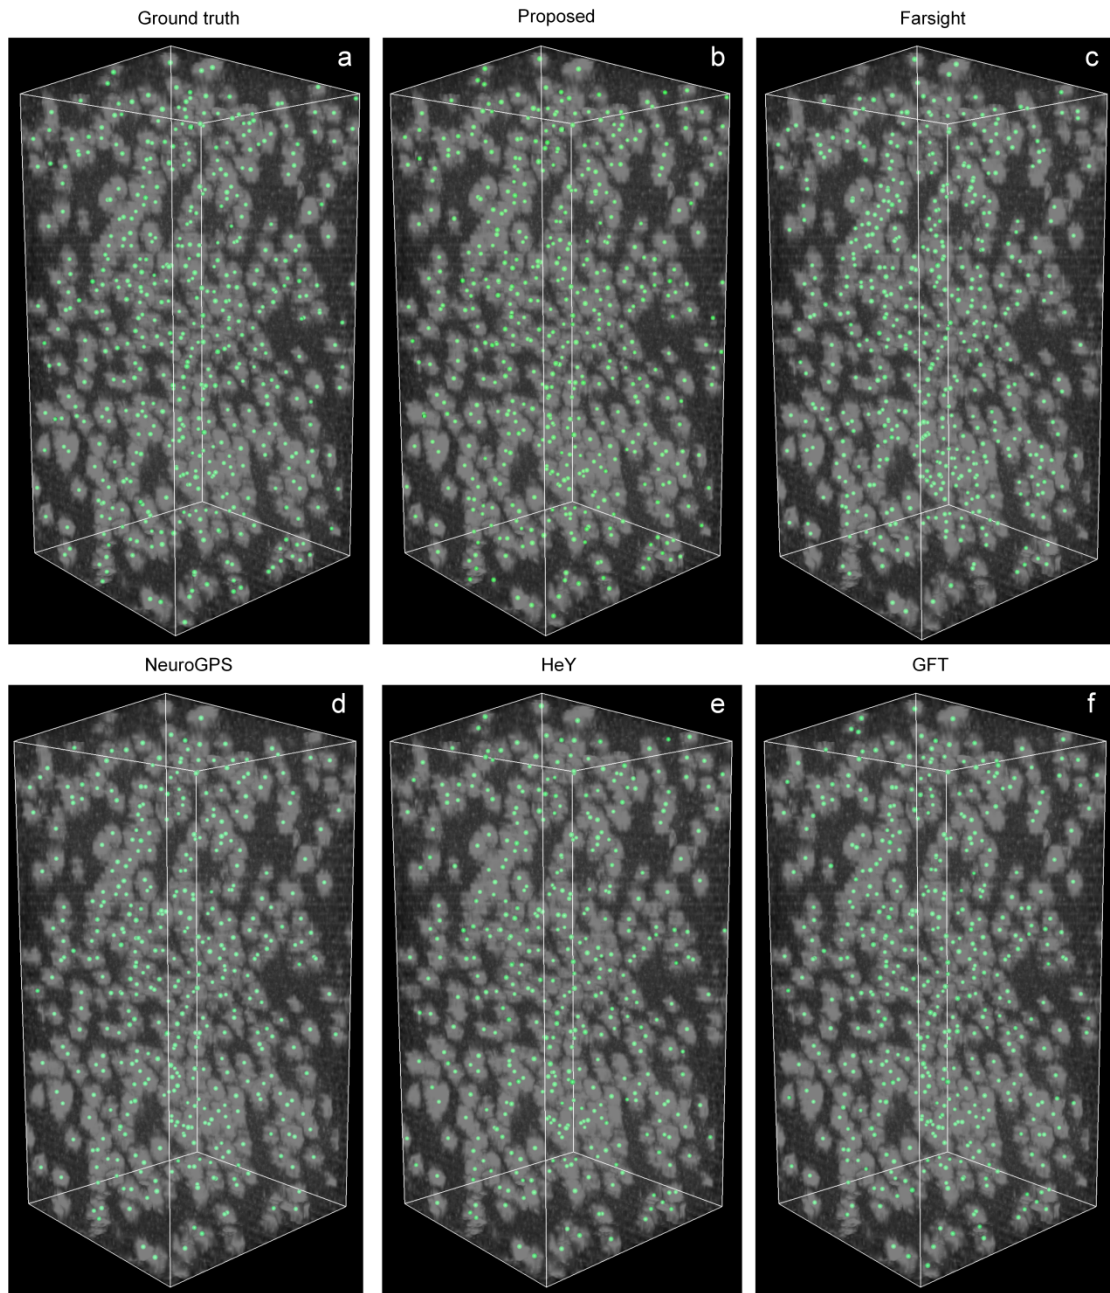

**Fig. S6.** Localization results of Data6.

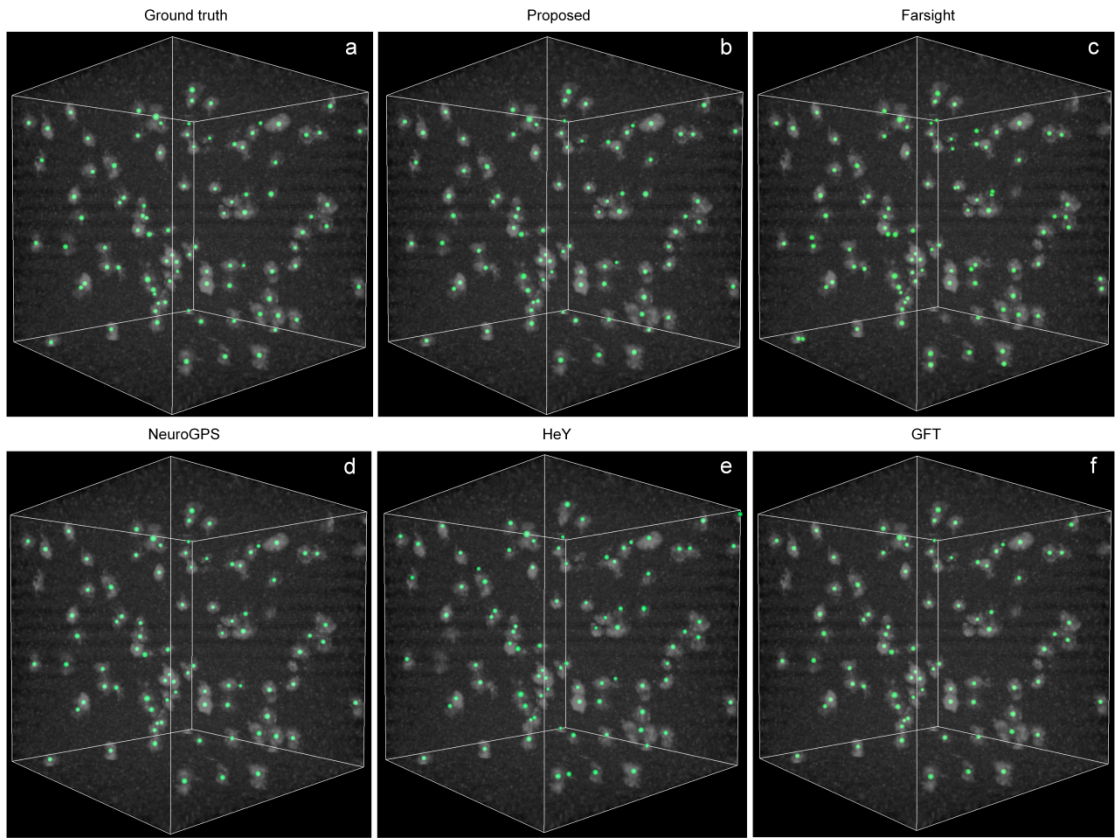

**Fig. S7.** Localization results of Data7.

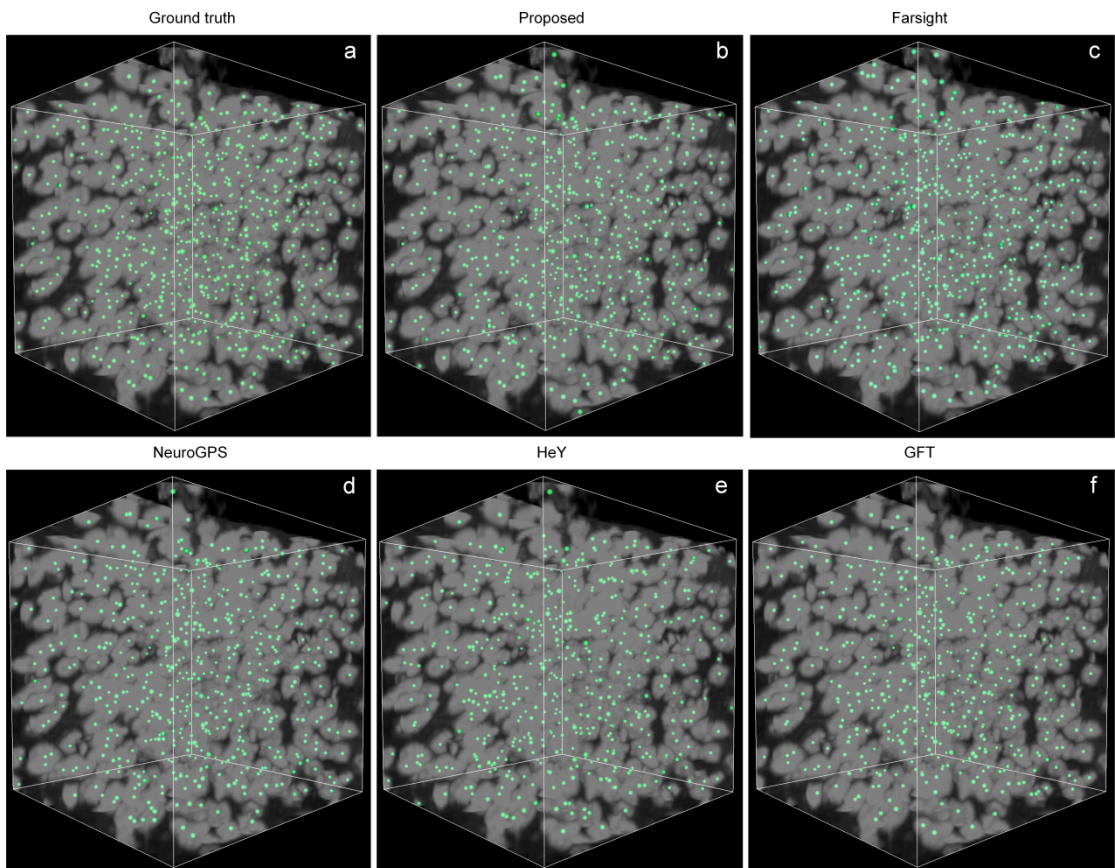

**Fig. S8.** Localization results of Data8.

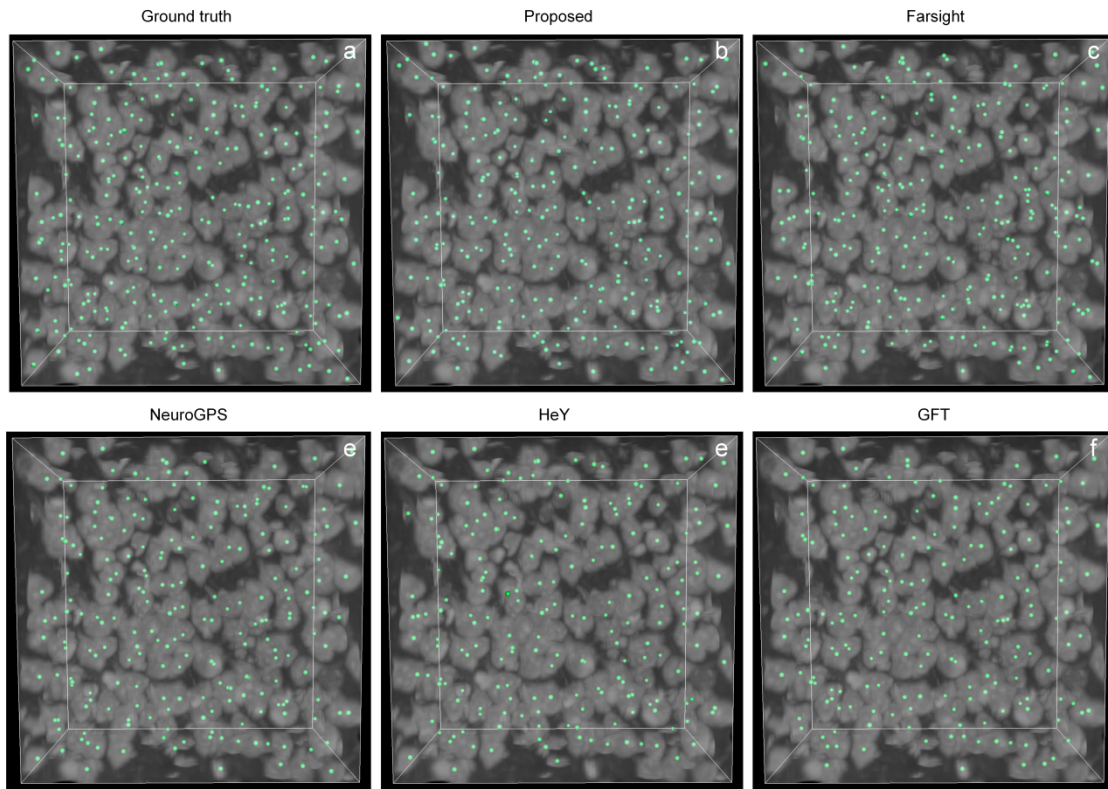

**Fig. S9.** Localization results of Data9.
